# Supplementary material
Source: PubMed Central journal article supplement (PMC6463715)
Supplement: supp_RA118.006816_142106_2_supp_285009_pmtfr2.pdf [file supp_RA118.006816_142106_2_supp_285009_pmtfr2.pdf]

## SUPPLEMENTARY

```

YiIP      *SILAALVDSLVDIGASLTNL...RADMLHYQSDVMMNGAIL
ZnT1     AMLSDFHMLSDVLALVVAL...RGVFLHVLGDALGSVIVV
ZnT5     GLISDGFHMLFDCSALVMGL...RGVFLHVLADTLGSIGVI
ZnT3     AIMTDAHLLADVGSMMGSL...RAAFVHVLGDLQSFQVL
ZnT4     AIMTDALHMLTDLIAIILTL...RAAFVHALGDLVQSVGVL
ZnT10    ALLSDSFNMLSDLISLCVGL...RGVLLHVMGDALGSVVVV
          .::: . * * : * * .::* .* : . ::
  
```

\* - Leads to Cd<sup>2+</sup> efflux (changes the transport affinity)

**Supp Fig.1| MSA analysis of hZnT10 vs. other hZnT family members.** Multiple Sequence Alignment of hZnT10 against different hZnT family members and the bacterial homologues YiiP (*Escherichia coli*), suggested tetrahedral site amino acids are highlighted in yellow as indicated. Note that both YiiP and ZnT10 show dissimilarity in the first residue of the tetrahedral site.

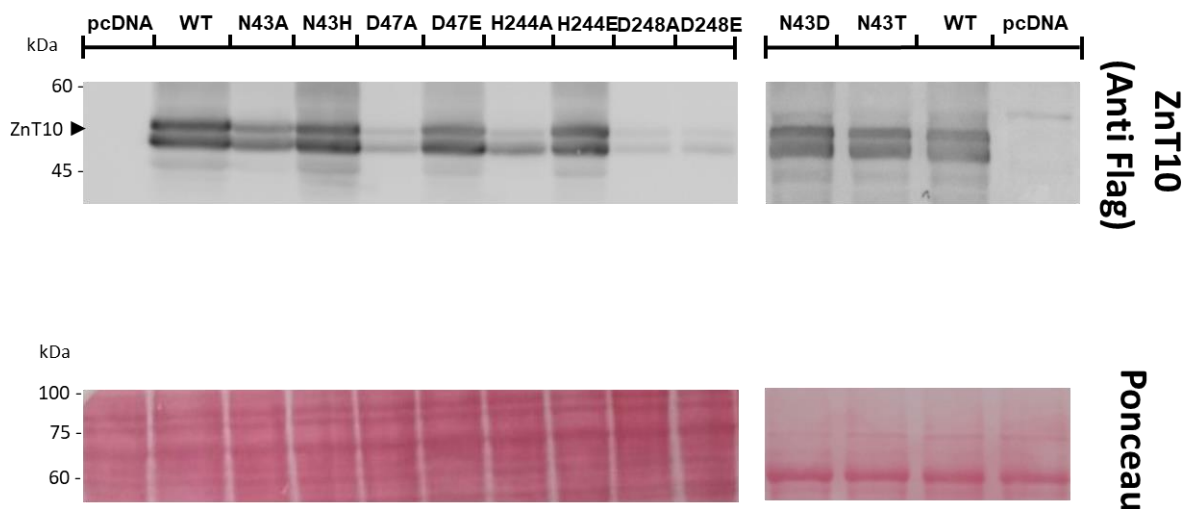

**Supp Fig.2| expression of ZnT10 mutants.** Western Blot analysis of ZnT10 mutants described in this study expressed in HEK-T cells.

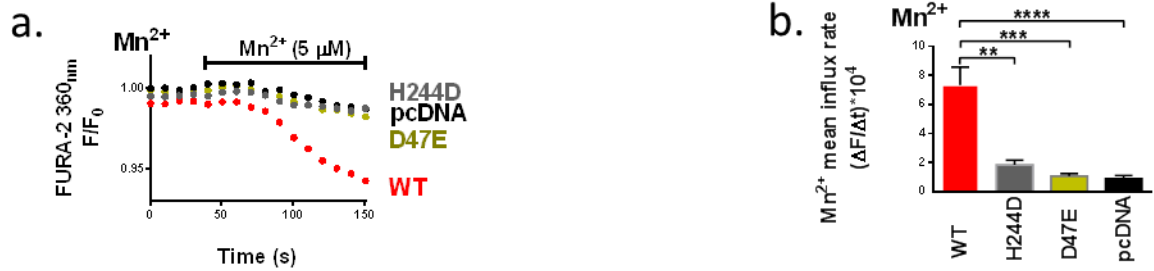

**Supp Fig.3| ZnT10 other tetrahedral residues are essential for  $Mn^{2+}$  transport. a,** Representative traces of  $Mn^{2+}$  influx in ZnT10 WT (red), pcDNA (black), ZnT10 H244D (gray) and ZnT10 D47E (yellow) transfected cells.  $Mn^{2+}$  influx ( $5 \mu M$ ) was determined as described in Fig. 1c. The horizontal bar indicates when Ringer's solution was replaced with Ringer's solution containing  $Mn^{2+}$  ( $5 \mu M$ ). **b,** Mean rates of cytoplasmic  $Mn^{2+}$  uptake for ZnT10 WT (n=6), pcDNA (n=7), ZnT10 H244D (n=3) and ZnT10 D47E (n=3) taken from Supp Fig.5a (\*\*p<0.01,\*\*\*p<0.001 \*\*\*\*p<0.0001).

**Supp Table.1:** Number of PDB files and metals used for binding preferences analysis of  $Zn^{2+}$ ,  $Mn^{2+}$  and  $Ca^{2+}$ .

|                                  | $Zn^{2+}$ | $Mn^{2+}$ | $Ca^{2+}$ |
|----------------------------------|-----------|-----------|-----------|
| # initial PDB files              | 2529      | 789       | 2351      |
| # PDB files with relevant metals | 2093      | 369       | 1831      |
| # used metals                    | 3938      | 629       | 3845      |

**Supp Table.2:** Amino acid preferences of Zn<sup>2+</sup>, Mn<sup>2+</sup> and Ca<sup>2+</sup>.

| Residue | Zn <sup>2+</sup> | Mn <sup>2+</sup> | Ca <sup>2+</sup> |
|---------|------------------|------------------|------------------|
| Ala     | 0.2%             | 0.7%             | 2.2%             |
| Arg     | 0.1% (0.0%)      | 0.2% (0.0%)      | 0.9% (0.0%)      |
| Asn     | 0.3% (0.2%)      | 2.2% (1.9%)      | 8.1% (6.0%)      |
| Asp     | 15.2% (15.1%)    | 38.7% (38.4%)    | 39.1% (35.8%)    |
| Cys     | 35.8% (35.7%)    | 1.1% (1.1%)      | 0.3% (0.0%)      |
| Gln     | 0.3% (0.2%)      | 1.4% (1.2%)      | 2.3% (1.3%)      |
| Glu     | 16.6% (16.4%)    | 25.8% (25.2%)    | 23.6% (21.8%)    |
| Gly     | 0.3%             | 0.7%             | 4.3%             |
| His     | 29.4% (29.1%)    | 24.0% (23.7%)    | 1.2% (0.5%)      |
| Ile     | 0.0%             | 0.4%             | 1.6%             |
| Leu     | 0.1%             | 0.2%             | 1.7%             |
| Lys     | 0.4% (0.4%)      | 0.4% (0.1%)      | 2.0% (0.1%)      |
| Met     | 0.2% (0.0%)      | 1.0% (0.0%)      | 0.4% (0.0%)      |
| Phe     | 0.0%             | 0.3%             | 1.0%             |
| Pro     | 0.0%             | 0.0%             | 0.7%             |
| Ser     | 0.5% (0.2%)      | 1.2% (0.9%)      | 3.5% (1.6%)      |
| Thr     | 0.2% (0.1%)      | 0.7% (0.3%)      | 3.8% (1.3%)      |
| Trp     | 0.1% (0.0%)      | 0.0% (0.0%)      | 0.2% (0.0%)      |
| Tyr     | 0.2% (0.1%)      | 0.1% (0.0%)      | 1.3% (0.1%)      |
| Val     | 0.1%             | 0.9%             | 1.7%             |

( ) refers to the percentage of the polar atoms of the side-chain that are bound to the metal (oxygen, sulfur and/or nitrogen)

**Supp Table.3:** Coordination number preferences of Zn<sup>2+</sup>, Mn<sup>2+</sup> and Ca<sup>2+</sup>.

| Coordination # | Zn <sup>2+</sup> | Mn <sup>2+</sup> | Ca <sup>2+</sup> |
|----------------|------------------|------------------|------------------|
| 1              | 0.0%             | 0.0%             | 0.0%             |
| 2              | 7.7%             | 7.6%             | 2.7%             |
| 3              | 13.2%            | 8.3%             | 5.4%             |
| 4              | 57.3%            | 12.4%            | 7.4%             |
| 5              | 13.9%            | 28.1%            | 11.4%            |
| 6              | 7.0%             | 38.8%            | 23.7%            |
| 7              | 0.5%             | 3.5%             | 38.8%            |
| 8              | 0.3%             | 0.6%             | 9.5%             |
| 9              | 0.1%             | 0.2%             | 0.6%             |
| 10             | 0.0%             | 0.3%             | 0.3%             |
| 11             | 0.0%             | 0.0%             | 0.1%             |
| 12             | 0.0%             | 0.0%             | 0.1%             |

**Supp Table.4:** A-site composition of all experimentally-determined manganese-sensitive CDF proteins.

| Protein               | Organism                                    | N43* | D47* | H244* | D248* |
|-----------------------|---------------------------------------------|------|------|-------|-------|
| sMTP8.1 <sup>§</sup>  | <i>Oryza sativa</i>                         | H    | D    | H     | D     |
| AtMTP8 <sup>§</sup>   | <i>Arabidopsis thaliana</i>                 | D    | D    | D     | D     |
| hvMTP8.1 <sup>§</sup> | <i>Hordeum vulgare</i>                      | D    | D    | D     | D     |
| hvMTP8.2 <sup>§</sup> | <i>Hordeum vulgare</i>                      | D    | D    | D     | D     |
| shMTP1 <sup>§</sup>   | <i>Stylosanthes hamata</i>                  | D    | D    | D     | D     |
| csMTP8 <sup>§</sup>   | <i>Cucumis sativus</i>                      | D    | D    | D     | D     |
| AtMTP11 <sup>§</sup>  | <i>Arabidopsis thaliana</i>                 | D    | D    | D     | D     |
| bmMTP11 <sup>§</sup>  | <i>Beta vulgaris</i> subsp. <i>maritima</i> | D    | D    | D     | D     |
| bmMTP10 <sup>§</sup>  | <i>Beta vulgaris</i> subsp. <i>maritima</i> | D    | D    | D     | D     |
| csMTP9 <sup>§</sup>   | <i>Cucumis sativus</i>                      | D    | D    | D     | D     |
| EmfA <sup>§</sup>     | <i>Rhizobium etli</i> CFN 42                | E    | N    | H     | D     |
| SMc02724 <sup>§</sup> | <i>Sinorhizobium meliloti</i> 1021          | E    | N    | H     | D     |
| spMntE <sup>§</sup>   | <i>Streptococcus pneumoniae</i> D39         | N    | D    | D     | D     |
| Spy0980 <sup>§</sup>  | <i>Streptococcus pyogenes</i> MGAS5005      | N    | D    | D     | D     |

Table data is based on MSA between all proteins and ZnT-10 sequences, by Clustal Omega(7, 8).

\* Refers to the residue in the same position in ZnT-10

§ Bacterial protein

§ Plant protein

Relevant references that show that these proteins transport Mn<sup>2+</sup>: 21-32.

**Supp Table.5:**  $K_m$  and  $V_{max}$  values of WT and N43T with respect to  $Mn^{2+}$ . Data is extrapolated from **Fig.5 h** and **Fig.1 f**.

|                  | WT        | N43T       |
|------------------|-----------|------------|
| Vmax<br>(a.u)    | 4.93±0.47 | 14.25±2.29 |
| Km<br>( $\mu$ M) | 1.23±0.06 | 4.61±1.81  |
